# Supplementary material for: Separation of Molar Weight-Distributed Polyethylene Glycols by Reversed-Phase Chromatography—II. Preparative Isolation of Pure Single Homologs
Source: MDPI journal article supplement (doi:10.3390/pr11030946), 2023-03-20
Supplement: s1 [file s1]

Supporting information to

# Separation of Molar Weight-Distributed Polyethylene Glycols by Reversed-Phase Chromatography – II. Preparative Isolation of Pure Single Homologs

by M. Supper, R. Jost, B. Bornschein, M. Kaspereit

(submitted to *Processes*)

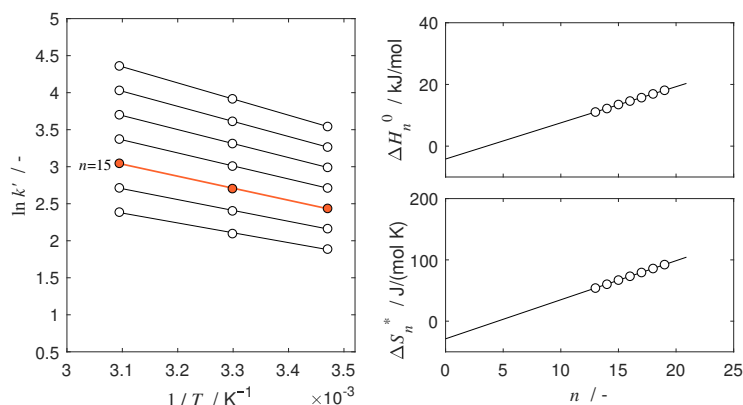

Figure S1: Determination of thermodynamic parameters for the separation of PEG 1000 on the preparative column for an eluent with 15 vol% ACN. **Left**—van't Hoff plot of data and linear regression (lines) for the different homologs. **Right**—enthalpic and entropic contributions as a function of  $n$ .

Table S1: Polynomial coefficients for interpolation of the thermodynamic parameters as used for calculating the lines in Fig. 4. Calculation in the form  $y = \sum_i p_i \cdot x^i$  with  $y = (\Delta H_r^\circ, \Delta H_e^\circ, \Delta S_r^*, \Delta S_e^*)$  and  $x$  as ACN content in vol%. Enthalpies in kJ/mol and entropies in J/(mol K).

|                    | $p_3$    | $p_2$     | $p_1$    | $p_0$      |
|--------------------|----------|-----------|----------|------------|
| $\Delta H_r^\circ$ | 0.000344 | -0.024937 | 0.619893 | -3.676850  |
| $\Delta H_e^\circ$ | 0.003738 | -0.188586 | 3.087358 | -20.668817 |
| $\Delta S_r^*$     | 0.000610 | -0.045490 | 1.043110 | -1.097541  |
| $\Delta S_e^*$     | 0.014140 | -0.715288 | 11.93781 | -94.633632 |

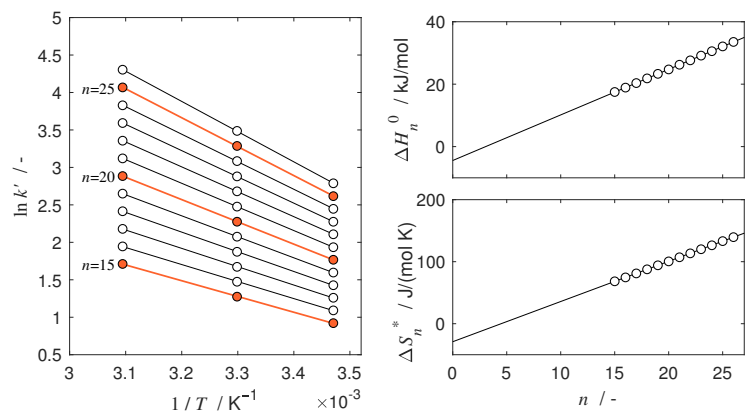

Figure S2: Determination of thermodynamic parameters for the separation of PEG 1000 on the preparative column for an eluent with 19 vol% ACN. **Left**—van't Hoff plot of data and linear regression (lines) for the different homologs. **Right**—enthalpic and entropic contributions as a function of  $n$ .

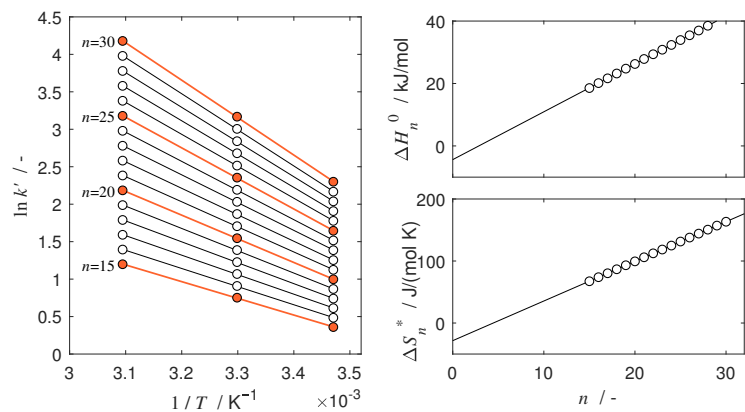

Figure S3: Determination of thermodynamic parameters for the separation of PEG 1000 on the preparative column for an eluent with 21 vol% ACN. **Left**—van't Hoff plot of data and linear regression (lines) for the different homologs. **Right**—enthalpic and entropic contributions as a function of  $n$ .

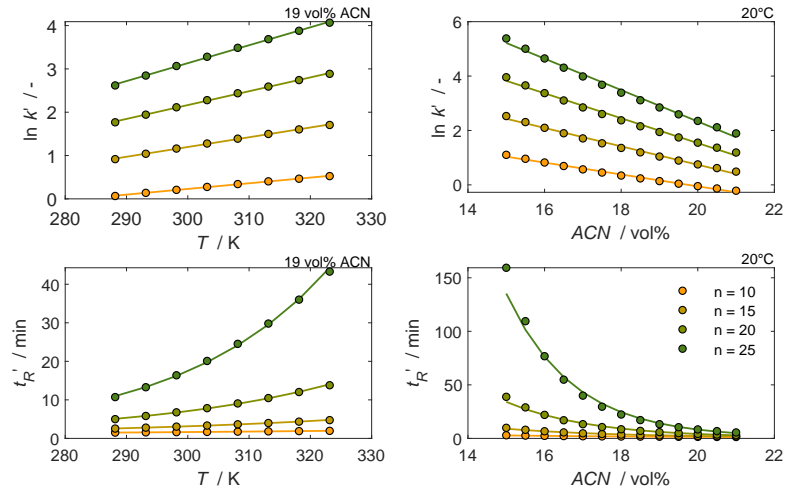

Figure S4: Comparison of  $k'$  and retention times predicted by the thermodynamic model (symbols) with the local linearized approximation of  $\ln k'$  by Eq. (5) (lines) as required for application of the LLS theory.
